# Supplementary material
Source: MDPI journal article supplement (https://www.mdpi.com/search?q=children-08-00080)
Supplement: s001 [file children-08-00080-s001.pdf]

Supplementary material.

**Table S1.** Cohort characteristics, neonatal morbidity and markers of lung disease.

|                                          | <b>BPD/preterm<br/>All<br/>n = 29</b> | <b>BPD/preterm<br/>with SPECT<br/>n = 25</b> | <b>Asthma/term<br/>n = 28</b> |
|------------------------------------------|---------------------------------------|----------------------------------------------|-------------------------------|
| <i>Clinical characteristics</i>          |                                       |                                              |                               |
| birth weight, grams                      | 1070 ± 423**                          | 991 ± 340                                    | 3591 ± 356**                  |
| age at birth, weeks                      | 27 <sup>+1</sup> ± 2.4**              | 26 <sup>+2</sup> ± 2.3                       | 40 <sup>+0</sup> ± 1.3**      |
| cesarian section, n (%)                  | 17 (59)**                             | 15 (60)                                      | 5 (25) <sup>b</sup> **        |
| sex, male (%)                            | 20 (69)                               | 18 (72)                                      | 19 (68)                       |
| maternal age, years                      | 32 ± 4                                | 32 ± 4                                       | 32 ± 4                        |
| paternal age, years                      | 34 ± 6                                | 33 ± 5                                       | 34 ± 7                        |
| age at study follow-up, years            | 10.4 ± 0.9                            | 10.4 ± 1.0                                   | 10.6 ± 0.6                    |
| female                                   | 11.0 ± 1.1*                           | 11.2 ± 1.2                                   | 10.7 ± 0.7                    |
| male                                     | 10.1 ± 0.6*                           | 10.1 ± 0.7                                   | 10.6 ± 0.6                    |
| <i>Neonatal morbidity</i>                |                                       |                                              |                               |
| supplementary oxygen, days               | 76 ± 38                               | 81 ± 12                                      |                               |
| CPAP, days                               | 38 ± 16                               | 40 ± 16                                      |                               |
| ventilator, days                         | 10 ± 12                               | 11 ± 13                                      |                               |
| antenatal steroids, n (%)                | 23 (85) <sup>a</sup>                  | 19 (82) <sup>a</sup>                         |                               |
| surfactant ≥ 1 dose, n (%)               | 18 (69) <sup>b</sup>                  | 16 (73) <sup>b</sup>                         |                               |
| treated PDA, n (%)                       | 19 (66)                               | 16 (64)                                      |                               |
| moderate/severe BPD, n (%)               | 16 (55)                               | 15 (60)                                      |                               |
| <i>Lung function at follow-up age 10</i> |                                       |                                              |                               |
| FEV <sub>1</sub> , %                     | 77 ± 12*                              | 76 ± 12                                      | 84 ± 11*                      |
| FEF <sub>50</sub> , %                    | 61 ± 16**                             | 61 ± 16                                      | 79 ± 21**                     |
| FEF <sub>25-75</sub> , %                 | 55 ± 14**                             | 54 ± 14                                      | 69 ± 19**                     |
| DLCO, mmol/min/kPa                       | 81 ± 13*                              | 80 ± 12                                      | 88 ± 10*                      |
| FENO, ppb                                | 12 ± 9*                               | 12 ± 10                                      | 23 ± 21*                      |
| RTL                                      | 1.56 [0.3]                            | 1.56 [0.3]                                   | 1.52 [0.4]                    |
| YKL-40                                   | 17.7 ± 6.3**                          | 17.2 ± 6.1                                   | 13.2 ± 3.8**                  |

Mean ± SD or median [IQR]; \*significance  $p < 0.05$ ; \*\*significance  $p < 0.01$ ; <sup>a</sup>missing value ( $n = 2$ ); <sup>b</sup>missing value, ( $n = 3$ ); <sup>c</sup>missing value ( $n = 4$ ); Dynamic spirometry values are reported as percentages of expected values corrected for length; FEV<sub>1</sub> = forced expiratory volume in one second; FEF<sub>25-75</sub> = forced expiratory volume, 25-75%; DLCO = diffusion capacity of carbon monoxide reported as percentage of expected values adjusted for age; FENO = fractional exhaled nitric oxide; ppb = parts per billion, PDA = patent ductus arteriosus; ROP = retinopathy of prematurity; CPAP = continuous positive airway pressure; RTL = relative telomere length; YKL-40 = chitinase-3-like protein 1

**Table S2.** Associations between the relative telomere length (RTL) and YKL-40 and spirometry at ten years of age in children born preterm with a history of BPD.

| <b>Lung function</b> | <b>YKL-40<br/>Coefficient (95% CI)</b> |
|----------------------|----------------------------------------|
| FEV <sub>1</sub>     | -0.07 [-0.27; 0.14]                    |
| FVC                  | -0.11 [-0.28; 0.07]                    |
| FEF <sub>25</sub>    | -0.02 [-0.18; 0.14]                    |
| FEF <sub>50</sub>    | -0.05 [-0.21; 0.10]                    |
| FEF <sub>75</sub>    | -0.01 [-0.17; 0.16]                    |
| FEF <sub>25-75</sub> | -0.02 [-0.23; 0.20]                    |
| DLCO, mmol/min/kPa   | -0.02 [-0.23; 0.20]                    |

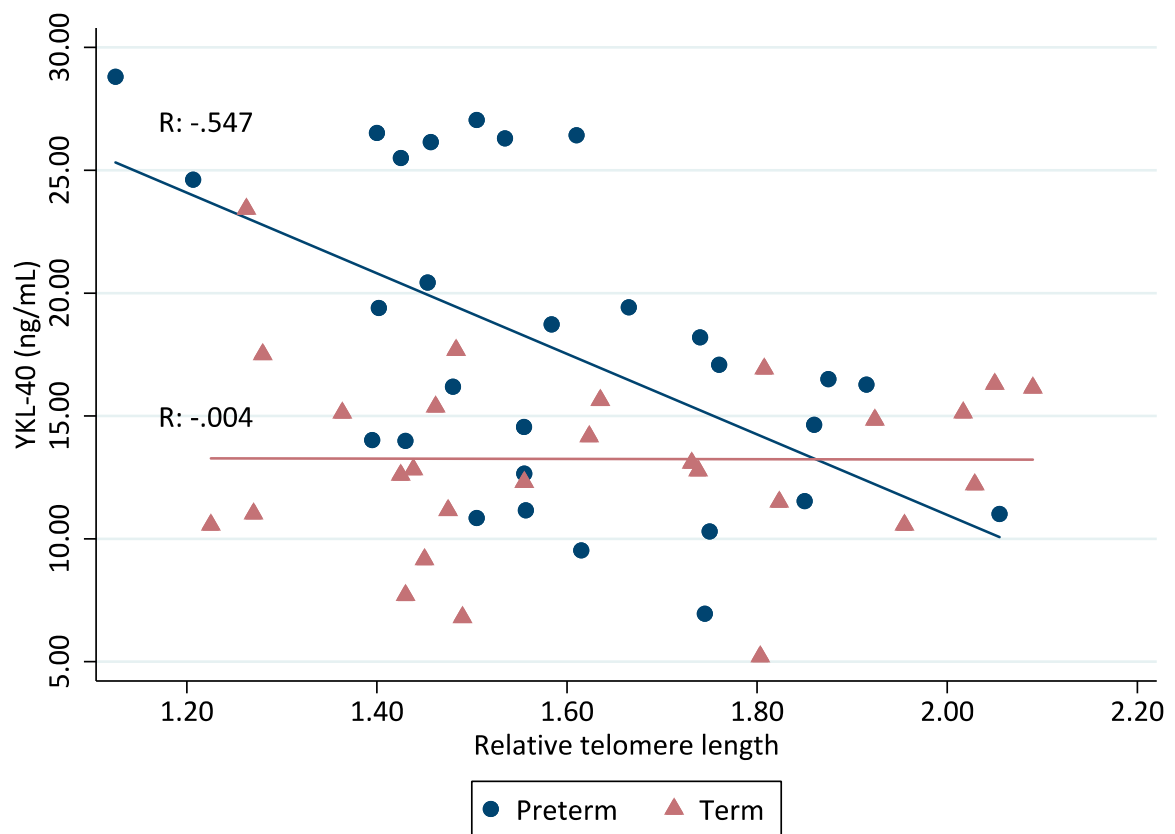

**Figure S1.** Correlations between relative telomere length (RTL) and YKL-40 at ten years of age. Children born preterm with a history of bronchopulmonary dysplasia ( $n = 29$ ) showed significantly higher levels of YKL-40 correlating to shorter RTLs ( $<0.01$ ) compared to children born term with allergic asthma ( $n = 28$ ) ( $p > 0.05$ ).
